# Supplementary material
Source: PubMed Central journal article supplement (PMC1838703)

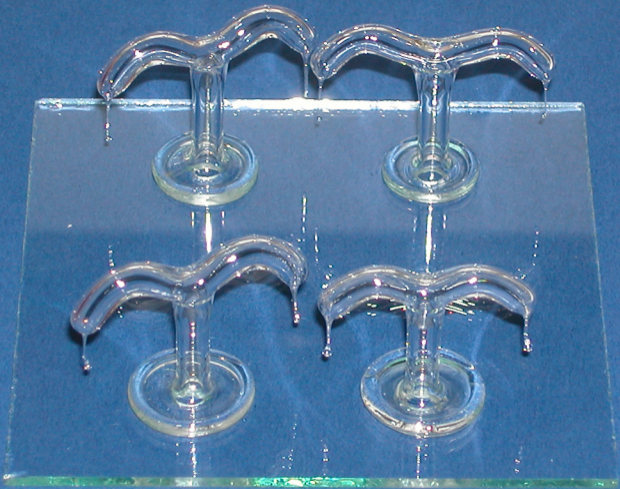

Supplement: pnas_0608586103_1.pdf [file pnas_0608586103_1.pdf]

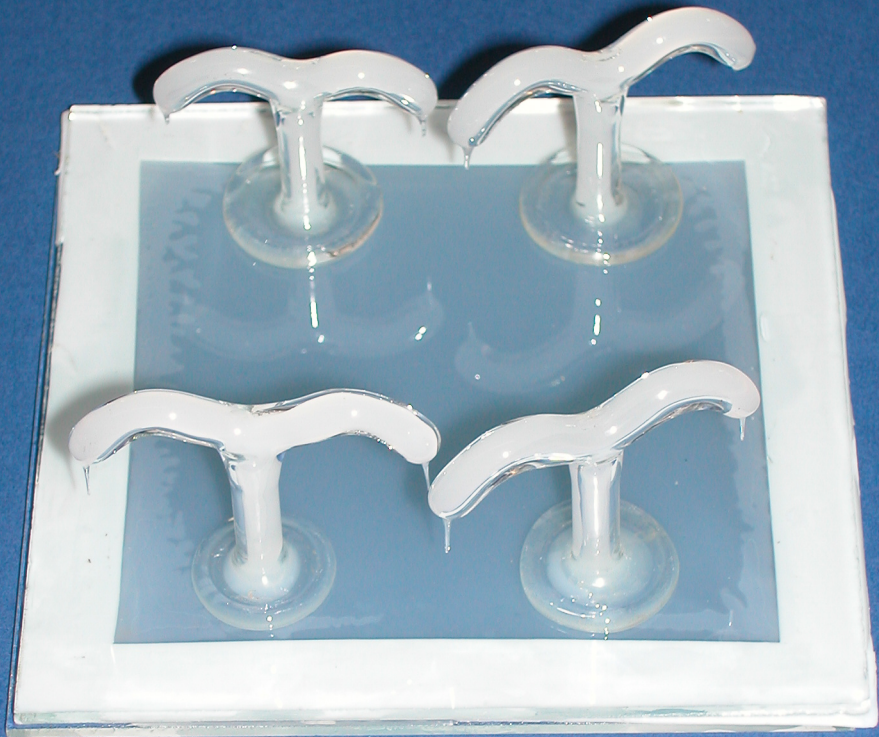

Supplement: pnas_0608586103_2.pdf [file pnas_0608586103_2.pdf]

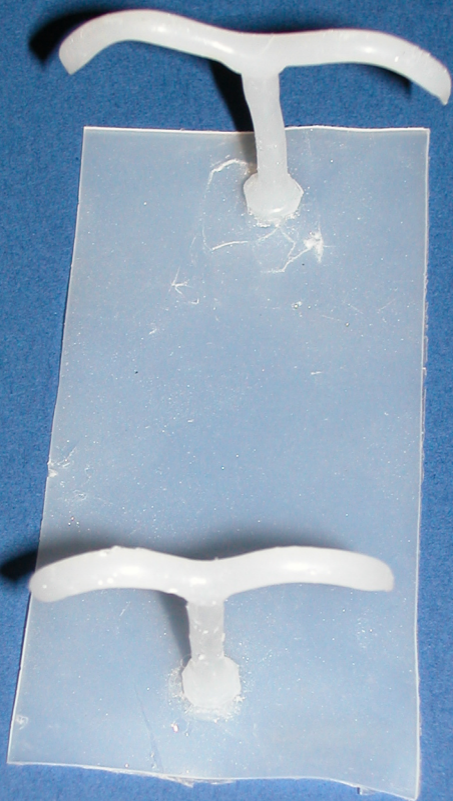

Supplement: pnas_0608586103_3.pdf [file pnas_0608586103_3.pdf]
